# Supplementary material
Source: publisher figshare collection journal article supplement (https://future-science-group.figshare.com/ndownloader/files/31112605)
Supplement: Supplementary file 1 [file 31112605]

## Sheet: tRF-Gly-CCC-006
The mRNA targets of treatment-related tsRNAs predicted by 2 software simultaneously.
Target genes for tRF-Gly-CCC-006
Target			Sites		TargetScan	miranda		Seed match types				Annotations
Seqname	GeneSymbol	Type	Diagrams	Total	Context+	Structure	Energy	8mer-1a	7mer-m8	7mer-1a	Imperfect	UTR Length
ENST00000378886	MCM8	Coding	Click Me	1	-0.448	140	-10.35	1	0	0	0	815
ENST00000321617	CASKIN2	Coding	Click Me	1	-0.345	147	-14.64	1	0	0	0	1021
HBMT00000697214	CATG00000038365.1	Coding	Click Me	1	-0.336	145	-14.08	1	0	0	0	1000
ENST00000251775	SNX4	Coding	Click Me	1	-0.383	140	-13.7	1	0	0	0	1135
NM_001145026	PTPRQ	Coding	Click Me	1	-0.306	140	-11.66	1	0	0	0	1166
HBMT00000787328	CATG00000046223.1	Coding	Click Me	1	-0.304	147	-12.95	0	1	0	0	1000
ENST00000304771	MAP6	Coding	Click Me	1	-0.318	154	-15.96	1	0	0	0	148
ENST00000290015	WNT9B	Coding	Click Me	1	-0.381	142	-10.01	1	0	0	0	3840
ENST00000273062	CTDSP1	Coding	Click Me	1	-0.311	141	-14.31	1	0	0	0	1516
ENST00000261263	RAB21	Coding	Click Me	1	-0.3	142	-10.76	0	1	0	0	5246
ENST00000316364	SEMA6D	Coding	Click Me	1	-0.331	153	-15.22	1	0	0	0	2438
ENST00000254801	JCHAIN	Coding	Click Me	1	-0.408	147	-12.99	1	0	0	0	788
ENST00000345617	HDAC4	Coding	Click Me	1	-0.319	146	-13.87	1	0	0	0	4929
ENST00000369295	ADRB1	Coding	Click Me	1	-0.389	148	-11.46	1	0	0	0	1342
ENST00000266682	SLC6A15	Coding	Click Me	1	-0.36	142	-11.35	1	0	0	0	2144
ENST00000306602	CXCL10	Coding	Click Me	1	-0.317	140	-10.67	1	0	0	0	814
ENST00000507469	SMG7	Coding	Click Me	1	-0.402	140	-10.93	1	0	0	0	1269
ENST00000377673	FAM216A	Coding	Click Me	1	-0.394	141	-11.45	1	0	0	0	1794
ENST00000346872	IKZF3	Coding	Click Me	1	-0.385	144	-11.48	1	0	0	0	8075
MICT00000343740	CATG00000098834.1	Coding	Click Me	1	-0.332	142	-11.38	1	0	0	0	1000
ENST00000519685	RHOBTB2	Coding	Click Me	1	-0.424	144	-11.44	1	0	0	0	972
ENST00000393335	CENPN	Coding	Click Me	1	-0.355	151	-14.7	1	0	0	0	420
ENST00000379942	PHKA2	Coding	Click Me	1	-0.346	143	-13.25	1	0	0	0	3737
ENST00000249066	APOL2	Coding	Click Me	1	-0.367	156	-18.76	1	0	0	0	1194
ENST00000641983	MAPK10	Coding	Click Me	1	-0.331	147	-14.23	1	0	0	0	4750
ENST00000239906	FAM53C	Coding	Click Me	1	-0.313	152	-16.05	1	0	0	0	3997
ENST00000362010	VEPH1	Coding	Click Me	1	-0.3	148	-12.53	0	1	0	0	1392
ENST00000493678	PARK7	Coding	Click Me	1	-0.441	148	-11.46	1	0	0	0	451
ENST00000369462	BRCC3	Coding	Click Me	1	-0.358	144	-11.65	1	0	0	0	5347
ENST00000216330	FKBP3	Coding	Click Me	1	-0.416	140	-11.36	1	0	0	0	599
ENST00000641592	OR2A12	Coding	Click Me	1	-0.362	145	-13.84	1	0	0	0	2913
ENST00000550078	ZBED6	Coding	Click Me	1	-0.401	141	-12.44	1	0	0	0	1070
ENST00000250160	WISP1	Coding	Click Me	1	-0.368	146	-16.41	1	0	0	0	3997
ENST00000537866	RSPRY1	Coding	Click Me	1	-0.361	146	-14.6	1	0	0	0	982
ENST00000617928	CYFIP1	Coding	Click Me	1	-0.438	151	-15.23	1	0	0	0	2976
ENST00000400577	RBM11	Coding	Click Me	1	-0.337	143	-11.46	1	0	0	0	1079
ENST00000366624	MAP3K21	Coding	Click Me	1	-0.323	145	-13.53	1	0	0	0	2610
ENST00000641439	OR9I1	Coding	Click Me	1	-0.318	146	-13.87	1	0	0	0	1758
ENST00000259053	CD302	Coding	Click Me	2	-0.704	289	-30.13	2	0	0	0	3297
ENST00000342358	ATP13A5	Coding	Click Me	1	-0.439	146	-13.69	1	0	0	0	252
ENST00000367098	IL20	Coding	Click Me	1	-0.413	141	-13.66	1	0	0	0	659
ENST00000620139	MREG	Coding	Click Me	1	-0.335	142	-11.46	1	0	0	0	1687
ENST00000532437	TNKS1BP1	Coding	Click Me	1	-0.372	140	-11.06	1	0	0	0	450
ENST00000372572	FOXJ3	Coding	Click Me	1	-0.302	142	-12.37	0	1	0	0	3171
ENST00000272771	TMEFF2	Coding	Click Me	1	-0.387	145	-13.54	1	0	0	0	294
ENST00000372146	GTF3C4	Coding	Click Me	1	-0.344	140	-11.43	1	0	0	0	6010
ENST00000240922	NAA50	Coding	Click Me	1	-0.364	142	-10.54	1	0	0	0	9436
ENST00000504764	LY75-CD302	Coding	Click Me	2	-0.704	289	-30.13	2	0	0	0	3297
MICT00000249041	CATG00000065905.1	Coding	Click Me	1	-0.314	152	-15.82	1	0	0	0	1000
ENST00000398015	EPHB1	Coding	Click Me	1	-0.309	146	-14.71	1	0	0	0	1347
ENST00000371079	ROR1	Coding	Click Me	1	-0.309	147	-10.13	0	1	0	0	2940
ENST00000262426	FOXF1	Coding	Click Me	1	-0.306	140	-10.9	1	0	0	0	2334
ENST00000251241	DHX40	Coding	Click Me	1	-0.395	147	-11.84	1	0	0	0	4140
ENST00000598338	AC119673.1	Coding	Click Me	1	-0.306	153	-17.08	1	0	0	0	434
ENST00000450660	FANCD2OS	Coding	Click Me	1	-0.415	140	-11.08	1	0	0	0	304
ENST00000357985	FAM3B	Coding	Click Me	1	-0.398	140	-12.35	1	0	0	0	530
ENST00000525778	SOGA3	Coding	Click Me	1	-0.307	145	-16.43	0	1	0	0	487
ENST00000229268	USP5	Coding	Click Me	1	-0.303	142	-11.3	1	0	0	0	554
ENST00000264059	EFHD1	Coding	Click Me	1	-0.34	143	-12.91	1	0	0	0	1066
ENST00000396577	SLC12A1	Coding	Click Me	1	-0.448	146	-13.96	1	0	0	0	1193
ENST00000456936	TMED7	Coding	Click Me	1	-0.33	148	-13.54	1	0	0	0	8900
HBMT00000297052	CATG00000007789.1	Coding	Click Me	1	-0.357	140	-11.56	1	0	0	0	1000
ENST00000407426	WDR43	Coding	Click Me	1	-0.377	144	-11.46	1	0	0	0	1443
ENST00000231461	ST8SIA4	Coding	Click Me	1	-0.304	152	-16.44	1	0	0	0	4924
ENST00000323662	KIAA1875	Coding	Click Me	1	-0.363	144	-13.6	1	0	0	0	2022
ENST00000381020	CDX2	Coding	Click Me	1	-0.345	146	-18.27	1	0	0	0	3500
ENST00000296509	MAD2L1	Coding	Click Me	1	-0.322	141	-11.74	1	0	0	0	4528
MICT00000081052	CATG00000012188.1	Coding	Click Me	1	-0.42	141	-12.01	1	0	0	0	1000
HBMT00000601312	CATG00000031489.1	Coding	Click Me	1	-0.315	150	-15.33	1	0	0	0	1000
ENCT00000343096	CATG00000075441.1	Coding	Click Me	1	-0.31	140	-11.24	1	0	0	0	1000
ENST00000300086	TERF2IP	Coding	Click Me	1	-0.379	140	-12.09	1	0	0	0	832
ENST00000310396	CPED1	Coding	Click Me	1	-0.332	149	-14.01	1	0	0	0	2627
ENST00000591680	GPATCH8	Coding	Click Me	1	-0.457	140	-10.6	1	0	0	0	2291
ENST00000642125	OR52A5	Coding	Click Me	1	-0.381	143	-10.03	1	0	0	0	2916
ENST00000372970	OSER1	Coding	Click Me	1	-0.398	140	-10.78	1	0	0	0	1111
ENST00000521988	TRIQK	Coding	Click Me	1	-0.351	142	-12.26	1	0	0	0	3092
ENST00000515393	MCTP1	Coding	Click Me	1	-0.36	140	-11.27	1	0	0	0	3095
ENST00000376215	PDSS1	Coding	Click Me	1	-0.31	150	-10.13	0	1	0	0	325
ENST00000285419	PIP4P2	Coding	Click Me	1	-0.371	140	-10.93	1	0	0	0	3252
ENST00000320785	KIF1C	Coding	Click Me	1	-0.347	146	-14.2	1	0	0	0	6285
ENST00000599836	BRD3OS	Coding	Click Me	1	-0.3	140	-12.5	1	0	0	0	788
ENST00000374431	LPAR1	Coding	Click Me	1	-0.405	142	-11.44	1	0	0	0	2161
ENST00000313525	DNAJC25	Coding	Click Me	1	-0.364	142	-14.3	1	0	0	0	1176
ENST00000294724	AGL	Coding	Click Me	1	-0.367	147	-12.86	1	0	0	0	2369
ENST00000304915	SMR3B	Coding	Click Me	1	-0.429	141	-11.46	1	0	0	0	396
ENST00000337109	MRPL35	Coding	Click Me	1	-0.419	141	-12.59	1	0	0	0	3126
ENCT00000043893	CATG00000107104.1	Coding	Click Me	1	-0.342	143	-11.46	1	0	0	0	1000
ENST00000374866	COL5A2	Coding	Click Me	1	-0.357	144	-11.74	1	0	0	0	2177
ENST00000274625	FGF18	Coding	Click Me	1	-0.361	145	-13.7	1	0	0	0	821
ENST00000584307	YES1	Coding	Click Me	1	-0.391	143	-11.51	1	0	0	0	2836
ENST00000644700	RPS10	Coding	Click Me	1	-0.326	142	-12.31	1	0	0	0	729
ENST00000391681	AC117834.1	Coding	Click Me	1	-0.398	145	-13.54	1	0	0	0	755
ENST00000253401	ARHGEF9	Coding	Click Me	1	-0.329	149	-16.74	1	0	0	0	3061
ENST00000361314	GPX7	Coding	Click Me	1	-0.321	141	-16.25	1	0	0	0	626
ENST00000510708	DTWD2	Coding	Click Me	1	-0.339	145	-14.32	1	0	0	0	1376
ENST00000532485	ACER3	Coding	Click Me	1	-0.302	141	-11.46	1	0	0	0	6470
ENST00000393784	ERGIC1	Coding	Click Me	1	-0.415	140	-10.11	1	0	0	0	3365
ENST00000585089	IFT20	Coding	Click Me	1	-0.33	140	-10.74	1	0	0	0	323
ENST00000556489	PROX2	Coding	Click Me	1	-0.347	142	-12.03	1	0	0	0	2099
ENST00000601181	CXCL17	Coding	Click Me	1	-0.352	143	-12.11	1	0	0	0	596
ENST00000252951	HBZ	Coding	Click Me	1	-0.345	140	-10.27	1	0	0	0	108
ENST00000262094	RAB27B	Coding	Click Me	1	-0.312	142	-12.3	1	0	0	0	6103
ENST00000359315	TPGS1	Coding	Click Me	1	-0.366	141	-10.42	1	0	0	0	3595
ENST00000604957	ARMCX5	Coding	Click Me	1	-0.322	147	-14.05	0	1	0	0	341
ENST00000239462	TNN	Coding	Click Me	1	-0.39	146	-11.04	1	0	0	0	995
ENST00000429078	CD302	Coding	Click Me	2	-0.742	289	-30.13	2	0	0	0	3221
ENST00000298097	FBXO33	Coding	Click Me	1	-0.415	147	-18.1	1	0	0	0	3374
ENST00000342947	GSDME	Coding	Click Me	1	-0.408	140	-10.44	1	0	0	0	673
ENST00000281543	GUF1	Coding	Click Me	1	-0.327	142	-11.35	1	0	0	0	4379
ENST00000379989	CDKL5	Coding	Click Me	1	-0.402	148	-13.54	1	0	0	0	85
ENST00000368713	S100A3	Coding	Click Me	1	-0.303	145	-14.32	1	0	0	0	355
ENST00000319136	APOL1	Coding	Click Me	1	-0.368	156	-18.76	1	0	0	0	1488
ENST00000553424	CD302	Coding	Click Me	2	-0.742	289	-30.13	2	0	0	0	3221
ENST00000389286	PRTG	Coding	Click Me	1	-0.31	143	-11.33	1	0	0	0	8471
ENST00000435989	ZNF814	Coding	Click Me	1	-0.387	148	-11.43	1	0	0	0	3443
ENST00000442697	DNAJB14	Coding	Click Me	1	-0.377	141	-12.46	1	0	0	0	4780
ENST00000531380	FZD4	Coding	Click Me	1	-0.351	144	-10.34	1	0	0	0	5467
ENST00000614798	CYSLTR1	Coding	Click Me	1	-0.415	140	-10.93	1	0	0	0	1253
ENST00000303130	ARHGAP42	Coding	Click Me	1	-0.341	140	-10.57	1	0	0	0	1237
ENST00000322953	BANK1	Coding	Click Me	1	-0.366	149	-14.68	1	0	0	0	740
ENST00000536985	PFKFB3	Coding	Click Me	1	-0.364	152	-17.13	1	0	0	0	3293
ENST00000254029	WDR44	Coding	Click Me	1	-0.409	143	-11.45	1	0	0	0	1018
ENST00000261070	COX17	Coding	Click Me	1	-0.365	145	-16.81	1	0	0	0	1735
ENST00000309731	GRAMD2A	Coding	Click Me	1	-0.304	150	-16.44	1	0	0	0	2203
ENST00000435962	TC2N	Coding	Click Me	1	-0.415	147	-14.35	1	0	0	0	3349
ENST00000373212	SH3BGRL	Coding	Click Me	1	-0.364	149	-17.01	1	0	0	0	1647
ENST00000380993	SLC12A1	Coding	Click Me	1	-0.449	146	-13.96	1	0	0	0	1191
ENST00000512478	OSTC	Coding	Click Me	1	-0.348	142	-14.13	1	0	0	0	583
ENST00000377050	UBD	Coding	Click Me	1	-0.48	140	-15.35	1	0	0	0	3328
ENST00000268182	IQGAP1	Coding	Click Me	1	-0.328	147	-13.53	1	0	0	0	2135
ENST00000376673	MBNL2	Coding	Click Me	1	-0.443	154	-12.4	1	0	0	0	2670
ENST00000261875	HACD3	Coding	Click Me	1	-0.308	140	-11.12	0	1	0	0	1992
ENST00000286692	DRAM2	Coding	Click Me	1	-0.317	158	-16.19	1	0	0	0	833
ENST00000238018	GDA	Coding	Click Me	1	-0.349	149	-12.9	1	0	0	0	449
ENST00000397545	CCDC40	Coding	Click Me	1	-0.346	148	-12.16	1	0	0	0	838
ENST00000355029	NET1	Coding	Click Me	1	-0.331	145	-13.54	1	0	0	0	2063
ENST00000285046	FGD5	Coding	Click Me	1	-0.363	144	-13.6	1	0	0	0	1398
ENST00000337768	SUPT7L	Coding	Click Me	1	-0.378	152	-15.76	1	0	0	0	2695
ENST00000297792	KDM1B	Coding	Click Me	1	-0.325	142	-11.37	1	0	0	0	1861
ENST00000361689	MACF1	Coding	Click Me	1	-0.424	149	-18.96	1	0	0	0	1193
FTMT22600005419	CATG00000096624.1	Coding	Click Me	1	-0.334	145	-13.64	1	0	0	0	756
ENST00000316273	BCAT2	Coding	Click Me	1	-0.334	146	-13.26	1	0	0	0	360
ENST00000361131	PPP1R14C	Coding	Click Me	1	-0.476	142	-15.07	1	0	0	0	1572
ENST00000267890	TTBK2	Coding	Click Me	1	-0.302	149	-17.27	1	0	0	0	7061
ENST00000599174	CCDC177	Coding	Click Me	1	-0.314	140	-11.53	1	0	0	0	1685
ENST00000646133	SMIM34B	Coding	Click Me	1	-0.373	140	-11.71	1	0	0	0	1391
ENST00000312814	TMEM168	Coding	Click Me	1	-0.311	142	-11.52	0	1	0	0	4815
ENST00000543753	KRTCAP3	Coding	Click Me	1	-0.333	142	-12.65	1	0	0	0	186
ENST00000377041	ABHD17B	Coding	Click Me	1	-0.422	145	-11.56	1	0	0	0	2683
MICT00000278151	CATG00000075035.1	Coding	Click Me	1	-0.318	149	-13.54	1	0	0	0	1000
ENST00000264613	CP	Coding	Click Me	1	-0.448	149	-14.01	1	0	0	0	1215
ENST00000361735	METTL13	Coding	Click Me	1	-0.436	140	-10.4	1	0	0	0	961
ENST00000455783	TMEM229A	Coding	Click Me	1	-0.304	144	-11.35	1	0	0	0	945
ENST00000536561	GCSAML	Coding	Click Me	1	-0.311	144	-15.1	1	0	0	0	3308
ENST00000524300	STAU2	Coding	Click Me	1	-0.3	140	-10.43	1	0	0	0	1001

## Sheet: tRF-Val-AAC-016
Target genes for tRF-Val-AAC-016
Target			Sites		TargetScan	miranda		Seed match types				Annotations
Seqname	GeneSymbol	Type	Diagrams	Total	Context+	Structure	Energy	8mer-1a	7mer-m8	7mer-1a	Imperfect	UTR Length
ENCT00000296543	CATG00000062558.1	Coding	Click Me	1	-0.311	176	-31.44	0	1	0	0	1000
ENST00000256079	IPO8	Coding	Click Me	1	-0.38	162	-19.74	1	0	0	0	1879
ENCT00000484826	CATG00000114901.1	Coding	Click Me	1	-0.512	156	-16.81	1	0	0	0	1000
ENST00000307378	SLCO1A2	Coding	Click Me	1	-0.351	172	-23.65	1	0	0	0	4948
ENST00000641196	OR6A2	Coding	Click Me	1	-0.408	168	-24.14	1	0	0	0	2989
ENST00000233057	EIF2AK2	Coding	Click Me	1	-0.375	156	-24.12	1	0	0	0	8063
ENST00000322652	SUZ12	Coding	Click Me	1	-0.311	157	-20.13	1	0	0	0	2042
ENST00000284245	C16orf74	Coding	Click Me	1	-0.319	158	-22.78	0	1	0	0	491
ENST00000274278	UGT3A1	Coding	Click Me	1	-0.346	157	-21.36	0	1	0	0	3192
ENST00000356109	ZNF44	Coding	Click Me	1	-0.524	167	-23.78	1	0	0	0	597
ENST00000559488	ITGB3	Coding	Click Me	1	-0.307	156	-22.49	1	0	0	0	3536
ENST00000612661	MARCKS	Coding	Click Me	1	-0.501	157	-16.23	1	0	0	0	2888
MICT00000336584	CATG00000097573.1	Coding	Click Me	1	-0.318	152	-26.12	1	0	0	0	1000
ENST00000210187	RAB26	Coding	Click Me	1	-0.319	168	-29.51	1	0	0	0	744
ENST00000290524	RFX5	Coding	Click Me	1	-0.322	149	-18.97	1	0	0	0	1546
ENST00000268035	IGF1R	Coding	Click Me	1	-0.404	162	-16.79	1	0	0	0	7088
ENST00000334690	TRAPPC11	Coding	Click Me	1	-0.412	159	-23.63	1	0	0	0	950
ENST00000374301	MTFR1L	Coding	Click Me	1	-0.32	156	-17.99	1	0	0	0	912
ENST00000258930	CIB2	Coding	Click Me	1	-0.341	155	-23.86	1	0	0	0	706
ENST00000302746	PDHB	Coding	Click Me	1	-0.513	168	-20.43	1	0	0	0	2880
ENST00000368029	ITLN2	Coding	Click Me	1	-0.411	148	-19.42	1	0	0	0	115
ENST00000367996	ADAMTS4	Coding	Click Me	1	-0.323	146	-16.55	1	0	0	0	6848
ENST00000344337	KPNA1	Coding	Click Me	1	-0.431	165	-26.86	1	0	0	0	5084
ENST00000507469	SMG7	Coding	Click Me	1	-0.363	176	-22.23	0	1	0	0	1269
ENST00000535373	ORC4	Coding	Click Me	1	-0.5	151	-18.8	1	0	0	0	5113
ENST00000263408	C9	Coding	Click Me	1	-0.366	170	-19.9	1	0	0	0	937
ENST00000259845	PSORS1C2	Coding	Click Me	1	-0.523	152	-18.49	1	0	0	0	417
ENST00000558762	IGF1R	Coding	Click Me	1	-0.404	162	-16.79	1	0	0	0	7087
MICT00000351466	CATG00000100867.1	Coding	Click Me	1	-0.418	144	-18.39	1	0	0	0	1000
ENST00000291539	PDE9A	Coding	Click Me	1	-0.385	161	-14.55	0	1	0	0	216
ENCT00000327138	CATG00000071295.1	Coding	Click Me	1	-0.426	173	-22.08	1	0	0	0	1000
ENST00000290649	AMFR	Coding	Click Me	1	-0.356	162	-18.24	0	1	0	0	1481
ENST00000360342	LZTS3	Coding	Click Me	1	-0.475	145	-16.29	1	0	0	0	1837
ENST00000181796	FAM107B	Coding	Click Me	1	-0.353	159	-17.57	0	1	0	0	2630
ENST00000370179	PPDPF	Coding	Click Me	1	-0.34	142	-24.9	1	0	0	0	3472
ENST00000258739	KDELR2	Coding	Click Me	1	-0.462	161	-20.13	1	0	0	0	2121
ENST00000382140	C1QTNF9B	Coding	Click Me	1	-0.512	148	-20.17	1	0	0	0	764
ENST00000396365	LILRA6	Coding	Click Me	1	-0.354	159	-23.14	1	0	0	0	404
ENST00000330368	ACTRT3	Coding	Click Me	1	-0.418	153	-19.92	1	0	0	0	3648
ENCT00000305670	CATG00000065281.1	Coding	Click Me	1	-0.338	148	-16.59	1	0	0	0	1000
ENST00000228928	OAS3	Coding	Click Me	1	-0.342	161	-22.93	1	0	0	0	3276
NM_001310135	TTC6	Coding	Click Me	1	-0.32	151	-21.27	0	1	0	0	334
ENST00000083182	APPBP2	Coding	Click Me	1	-0.367	144	-17.01	1	0	0	0	4434
ENST00000479870	TCAF1	Coding	Click Me	1	-0.32	170	-20.28	1	0	0	0	2765
ENST00000366621	KCNK1	Coding	Click Me	1	-0.43	161	-18.72	1	0	0	0	5132
ENST00000298912	CLMN	Coding	Click Me	1	-0.318	153	-17.36	1	0	0	0	9625
MICT00000277848	CATG00000079011.1	Coding	Click Me	1	-0.328	148	-16.03	1	0	0	0	1000
ENST00000256442	CCNB1	Coding	Click Me	1	-0.394	152	-29	1	0	0	0	2896
HBMT00000220955	CATG00000002605.1	Coding	Click Me	1	-0.402	158	-19.34	1	0	0	0	1000
ENST00000264451	SLC30A9	Coding	Click Me	1	-0.351	161	-19.2	1	0	0	0	4331
HBMT00000626818	CATG00000033628.1	Coding	Click Me	1	-0.314	147	-22.28	1	0	0	0	1000
HBMT00000380478	CATG00000014206.1	Coding	Click Me	1	-0.536	161	-20.95	1	0	0	0	1000
ENST00000355377	SYT17	Coding	Click Me	1	-0.496	146	-16.04	1	0	0	0	1255
ENST00000250974	ABHD17A	Coding	Click Me	1	-0.355	150	-16.68	0	1	0	0	224
ENST00000274353	BHMT	Coding	Click Me	1	-0.488	172	-22.85	1	0	0	0	1174
ENCT00000424376	CATG00000098647.1	Coding	Click Me	1	-0.331	187	-26.3	0	1	0	0	1000
ENST00000299106	JAM3	Coding	Click Me	1	-0.402	162	-17.93	1	0	0	0	2820
ENST00000620347	SLC1A7	Coding	Click Me	1	-0.397	160	-24.44	1	0	0	0	489
ENST00000397764	SMIM30	Coding	Click Me	1	-0.396	153	-24.01	1	0	0	0	1490
ENST00000440960	PRELID3A	Coding	Click Me	1	-0.333	154	-25.4	1	0	0	0	1117
FTMT21800003108	CATG00000079706.1	Coding	Click Me	1	-0.372	160	-18.29	1	0	0	0	1000
ENST00000377524	STAM	Coding	Click Me	1	-0.382	166	-17.35	1	0	0	0	2042
ENST00000369075	SEC23IP	Coding	Click Me	1	-0.367	155	-21.96	1	0	0	0	4093
MICT00000068912	CATG00000004063.1	Coding	Click Me	1	-0.392	151	-19.52	1	0	0	0	1000
MICT00000238784	CATG00000059304.1	Coding	Click Me	1	-0.368	153	-16.47	1	0	0	0	1000
ENST00000379108	KCTD4	Coding	Click Me	1	-0.422	144	-19.92	1	0	0	0	935
ENST00000381346	RDH11	Coding	Click Me	1	-0.496	158	-20.77	1	0	0	0	1545
ENST00000617714	PRSS56	Coding	Click Me	1	-0.361	167	-16.83	0	1	0	0	210
ENST00000372236	POLH	Coding	Click Me	1	-0.435	171	-26.07	1	0	0	0	5966
MICT00000298396	CATG00000083045.1	Coding	Click Me	1	-0.383	150	-17.24	1	0	0	0	1000
HBMT00000773032	CATG00000043861.1	Coding	Click Me	1	-0.377	151	-31.81	1	0	0	0	1000
ENST00000357485	ARID5A	Coding	Click Me	1	-0.389	153	-21.8	1	0	0	0	325
ENST00000269197	ASXL3	Coding	Click Me	1	-0.431	157	-19.77	1	0	0	0	4597
ENCT00000422686	CATG00000098135.1	Coding	Click Me	1	-0.375	161	-21.94	1	0	0	0	1000
ENST00000220429	GABPB1	Coding	Click Me	1	-0.421	155	-16.83	1	0	0	0	1369
ENST00000357084	ATP2A1	Coding	Click Me	1	-0.435	160	-17.25	1	0	0	0	304
MICT00000015919	CATG00000009743.1	Coding	Click Me	1	-0.439	142	-17.3	1	0	0	0	1000
ENST00000273666	STXBP5L	Coding	Click Me	1	-0.406	158	-17.11	1	0	0	0	5664
HBMT00000424838	CATG00000018275.1	Coding	Click Me	1	-0.4	146	-20.99	1	0	0	0	1000
MICT00000164176	CATG00000036588.1	Coding	Click Me	1	-0.486	155	-16.88	1	0	0	0	1000
ENST00000354992	LARGE1	Coding	Click Me	1	-0.313	147	-21.2	0	1	0	0	1895
ENST00000307142	SYNPO2	Coding	Click Me	1	-0.529	162	-18.69	1	0	0	0	3313
ENST00000297107	GALNT10	Coding	Click Me	1	-0.376	167	-18.76	1	0	0	0	4012
ENST00000378585	GABRD	Coding	Click Me	1	-0.355	175	-24.38	1	0	0	0	471
FTMT22000006530	CATG00000077030.1	Coding	Click Me	2	-0.731	305	-32.86	2	0	0	0	1000
ENST00000532798	CCDC179	Coding	Click Me	1	-0.508	144	-20.17	1	0	0	0	588
ENST00000301599	TMEM88	Coding	Click Me	1	-0.328	141	-20.22	1	0	0	0	385
FTMT23200007183	CATG00000100722.1	Coding	Click Me	1	-0.3	154	-19.82	0	1	0	0	1000
ENST00000354785	FN1	Coding	Click Me	1	-0.419	151	-16.93	1	0	0	0	1101
MICT00000368546	CATG00000110053.1	Coding	Click Me	1	-0.413	160	-24.32	1	0	0	0	1000
ENST00000373130	STK40	Coding	Click Me	1	-0.476	149	-16.03	1	0	0	0	2131
ENST00000381337	THUMPD1	Coding	Click Me	1	-0.309	190	-28.78	0	1	0	0	2715
ENST00000323346	SLC17A8	Coding	Click Me	1	-0.462	167	-16.23	1	0	0	0	1900
ENST00000423759	TAF1	Coding	Click Me	1	-0.442	175	-27.25	1	0	0	0	1958
ENST00000574788	USP6	Coding	Click Me	1	-0.482	144	-15.94	1	0	0	0	2013
FTMT23600008736	CATG00000107338.1	Coding	Click Me	1	-0.411	147	-18.84	1	0	0	0	1000
ENST00000355413	AGK	Coding	Click Me	1	-0.357	152	-20.7	1	0	0	0	2320
ENST00000367012	SERTAD4	Coding	Click Me	1	-0.443	163	-16.03	1	0	0	0	4518
ENCT00000145796	CATG00000024256.1	Coding	Click Me	1	-0.399	166	-22.03	1	0	0	0	1000
ENST00000264834	KLF1	Coding	Click Me	1	-0.348	153	-21.61	1	0	0	0	462
ENST00000511367	DROSHA	Coding	Click Me	1	-0.505	154	-18.68	1	0	0	0	937
ENCT00000482353	CATG00000114608.1	Coding	Click Me	1	-0.316	159	-17.96	1	0	0	0	1000
ENST00000375851	S1PR3	Coding	Click Me	1	-0.366	160	-16.38	1	0	0	0	4154
HBMT00000920938	CATG00000056069.1	Coding	Click Me	1	-0.302	168	-22.99	1	0	0	0	1000
ENST00000367075	EZR	Coding	Click Me	1	-0.382	165	-24.88	1	0	0	0	1166
ENST00000305231	UGT2B7	Coding	Click Me	1	-0.567	174	-27.04	1	0	0	0	251
ENST00000273859	ATP10D	Coding	Click Me	1	-0.394	151	-18.76	1	0	0	0	2105
ENST00000389532	CAMSAP1	Coding	Click Me	1	-0.308	153	-18.14	1	0	0	0	2822
ENST00000075503	STYK1	Coding	Click Me	1	-0.367	162	-22.26	1	0	0	0	1216
HBMT00000776583	CATG00000044527.1	Coding	Click Me	1	-0.387	168	-26.69	1	0	0	0	1000
ENST00000378536	SKI	Coding	Click Me	1	-0.327	143	-26.07	0	1	0	0	3448
ENST00000435030	KIF5C	Coding	Click Me	1	-0.408	157	-19.54	1	0	0	0	3689
ENST00000369838	SH3BGRL2	Coding	Click Me	1	-0.409	155	-17.69	1	0	0	0	4854
FTMT28800001191	CATG00000057657.1	Coding	Click Me	1	-0.335	173	-24.64	1	0	0	0	1000
ENST00000253329	PPIL4	Coding	Click Me	1	-0.3	157	-16.72	0	1	0	0	3782
ENST00000332715	URAD	Coding	Click Me	1	-0.419	170	-24.28	1	0	0	0	392
ENST00000354200	TBC1D20	Coding	Click Me	1	-0.305	176	-15.64	1	0	0	0	3109
ENST00000169551	TIMM21	Coding	Click Me	1	-0.495	168	-17.19	1	0	0	0	489
ENST00000605337	MRPL37	Coding	Click Me	1	-0.369	143	-19.56	1	0	0	0	82
ENST00000610581	SPRY1	Coding	Click Me	1	-0.528	170	-16.03	1	0	0	0	1209
ENST00000356352	UPF2	Coding	Click Me	1	-0.307	140	-22.51	1	0	0	0	1276
MICT00000099952	CATG00000016383.1	Coding	Click Me	1	-0.399	176	-22.09	1	0	0	0	1000
ENST00000240651	PYROXD1	Coding	Click Me	1	-0.483	147	-22.04	1	0	0	0	2494
ENCT00000346150	CATG00000076354.1	Coding	Click Me	1	-0.418	147	-26.58	1	0	0	0	1000
FTMT20400000680	CATG00000025492.1	Coding	Click Me	1	-0.424	153	-21.34	1	0	0	0	221
ENST00000341267	DLK1	Coding	Click Me	1	-0.425	164	-24.61	1	0	0	0	3326
ENST00000261195	GYS2	Coding	Click Me	1	-0.415	149	-20.06	1	0	0	0	765
ENST00000369146	SV2A	Coding	Click Me	1	-0.356	153	-20.97	0	1	0	0	1696
ENST00000301365	TRPV3	Coding	Click Me	1	-0.367	173	-21.12	1	0	0	0	3416
MICT00000343563	CATG00000098775.1	Coding	Click Me	1	-0.349	151	-16.03	1	0	0	0	1000
ENST00000265379	COL6A5	Coding	Click Me	1	-0.463	161	-20.17	1	0	0	0	884
ENST00000360150	ERGIC2	Coding	Click Me	1	-0.353	163	-21.41	1	0	0	0	4311
ENST00000330387	CREB3L2	Coding	Click Me	1	-0.315	152	-16.33	1	0	0	0	5497
ENST00000366960	RPS6KC1	Coding	Click Me	1	-0.326	152	-16.63	1	0	0	0	2139
ENST00000423059	THSD7A	Coding	Click Me	1	-0.323	168	-16.8	0	1	0	0	5437
ENST00000645668	TSEN15	Coding	Click Me	1	-0.441	167	-20.37	1	0	0	0	1365
ENST00000367282	GPR37L1	Coding	Click Me	1	-0.336	154	-27.57	1	0	0	0	5036
FTMT24000007118	CATG00000116804.1	Coding	Click Me	1	-0.521	164	-21.45	1	0	0	0	1000
ENST00000339948	ZNF648	Coding	Click Me	1	-0.308	186	-30.82	0	1	0	0	1734
ENST00000382292	SACS	Coding	Click Me	2	-0.793	327	-41.38	2	0	0	0	1310
ENST00000380817	SBF1	Coding	Click Me	1	-0.381	159	-29.61	1	0	0	0	2142
ENST00000376344	C9orf64	Coding	Click Me	1	-0.456	170	-24.02	1	0	0	0	5152
ENST00000319273	TAC1	Coding	Click Me	1	-0.372	153	-24.12	1	0	0	0	552
ENST00000636672	PRRT1B	Coding	Click Me	1	-0.345	153	-26.9	1	0	0	0	418
ENCT00000279299	CATG00000057879.1	Coding	Click Me	1	-0.322	172	-30.04	1	0	0	0	1000
MICT00000363210	CATG00000106275.1	Coding	Click Me	1	-0.515	185	-26.75	1	0	0	0	1000
ENST00000566799	CORO2B	Coding	Click Me	1	-0.309	161	-23.16	1	0	0	0	1829
ENCT00000066324	CATG00000002156.1	Coding	Click Me	1	-0.385	152	-22.78	1	0	0	0	1000
ENST00000329713	MEX3B	Coding	Click Me	1	-0.305	159	-19.71	0	1	0	0	1383
ENST00000508661	UGT2B7	Coding	Click Me	1	-0.576	174	-27.04	1	0	0	0	496
ENST00000406697	C1S	Coding	Click Me	1	-0.34	157	-15.51	0	1	0	0	1119
ENST00000645071	TLR4	Coding	Click Me	1	-0.307	155	-18.7	0	1	0	0	10082
ENST00000378933	TAB3	Coding	Click Me	1	-0.327	143	-18.56	0	1	0	0	3985
ENST00000274773	TRIM7	Coding	Click Me	1	-0.38	144	-18.19	1	0	0	0	4116
ENST00000257527	ADAM19	Coding	Click Me	1	-0.368	150	-15.92	1	0	0	0	3884
ENST00000308031	ZNF471	Coding	Click Me	1	-0.452	166	-22.24	1	0	0	0	4285
FTMT29200000673	CATG00000110325.1	Coding	Click Me	1	-0.374	158	-17.93	1	0	0	0	1000
HBMT00000214267	CATG00000002036.1	Coding	Click Me	1	-0.344	168	-29.21	1	0	0	0	958
ENST00000367455	UCHL5	Coding	Click Me	1	-0.435	153	-18.79	1	0	0	0	4101
ENST00000373448	TTI1	Coding	Click Me	1	-0.308	165	-21.14	0	1	0	0	450
MICT00000269173	CATG00000069665.1	Coding	Click Me	1	-0.372	148	-20.29	1	0	0	0	1000
ENST00000375571	MAPRE1	Coding	Click Me	1	-0.347	147	-17.83	1	0	0	0	1677
ENST00000583509	ACP6	Coding	Click Me	1	-0.423	147	-19.07	1	0	0	0	5188
MICT00000279148	CATG00000079201.1	Coding	Click Me	1	-0.327	168	-28.93	1	0	0	0	1000
ENCT00000021054	CATG00000044667.1	Coding	Click Me	1	-0.325	151	-23.27	1	0	0	0	1000
ENST00000339223	FPR3	Coding	Click Me	1	-0.445	140	-20.73	1	0	0	0	1379

## Sheet: tRF-Val-TAC-016
Target genes for tRF-Val-TAC-016
Target			Sites		TargetScan	miranda		Seed match types				Annotations
Seqname	GeneSymbol	Type	Diagrams	Total	Context+	Structure	Energy	8mer-1a	7mer-m8	7mer-1a	Imperfect	UTR Length
ENST00000262207	CRISPLD1	Coding	Click Me	1	-0.382	152	-17.29	1	0	0	0	2316
ENST00000011898	TSPAN9	Coding	Click Me	1	-0.372	158	-18.99	1	0	0	0	3442
ENST00000265081	MSH3	Coding	Click Me	1	-0.333	151	-20.3	1	0	0	0	4432
ENST00000254958	JAG1	Coding	Click Me	1	-0.314	145	-14.24	1	0	0	0	1819
ENST00000396065	GCNT3	Coding	Click Me	1	-0.324	155	-24.92	1	0	0	0	1269
ENST00000282541	GPD1L	Coding	Click Me	1	-0.37	166	-21.96	1	0	0	0	2805
ENST00000228438	CLEC2B	Coding	Click Me	1	-0.32	169	-24.48	1	0	0	0	946
ENST00000287598	BUB1B	Coding	Click Me	1	-0.342	152	-24.41	1	0	0	0	377
ENST00000455584	RP11-385D13.1	Coding	Click Me	1	-0.318	163	-27.08	1	0	0	0	2608
ENCT00000080782	CATG00000006216.1	Coding	Click Me	1	-0.307	157	-25.18	1	0	0	0	1000
ENST00000323669	DDHD1	Coding	Click Me	1	-0.339	150	-16.51	1	0	0	0	10028
ENST00000300107	CLPX	Coding	Click Me	1	-0.331	176	-30.85	1	0	0	0	2604
ENST00000005284	CACNG3	Coding	Click Me	1	-0.375	153	-19.6	1	0	0	0	938
ENST00000217909	SLC25A43	Coding	Click Me	1	-0.311	144	-19	1	0	0	0	1413
ENST00000370902	EXOSC1	Coding	Click Me	1	-0.324	151	-20.28	1	0	0	0	536
ENST00000360586	WDHD1	Coding	Click Me	1	-0.315	169	-30.88	1	0	0	0	2552
ENST00000261381	XYLT1	Coding	Click Me	2	-0.623	330	-44.52	2	0	0	0	6926
ENST00000261917	HCN4	Coding	Click Me	1	-0.32	152	-23.72	1	0	0	0	5349
ENST00000376811	NMRK1	Coding	Click Me	1	-0.323	157	-22.38	1	0	0	0	975
ENST00000373585	DDX50	Coding	Click Me	1	-0.401	155	-15.5	1	0	0	0	718
ENST00000376656	TRIM39	Coding	Click Me	1	-0.408	164	-20.54	1	0	0	0	1469
ENST00000361580	KIFAP3	Coding	Click Me	1	-0.46	161	-15.41	1	0	0	0	603
ENST00000611870	CNTNAP4	Coding	Click Me	1	-0.369	169	-19.97	1	0	0	0	555
ENST00000611977	DGKK	Coding	Click Me	1	-0.3	146	-15.21	1	0	0	0	3531
ENST00000523374	ZNF674	Coding	Click Me	1	-0.367	166	-25.44	1	0	0	0	2118
ENST00000333781	WRB	Coding	Click Me	1	-0.365	153	-13.61	1	0	0	0	970
ENST00000535381	C5orf63	Coding	Click Me	1	-0.38	160	-19.59	1	0	0	0	5112
ENST00000305494	TMEM135	Coding	Click Me	1	-0.358	170	-22.09	1	0	0	0	1017
ENST00000328886	TMIGD1	Coding	Click Me	1	-0.383	154	-29.85	1	0	0	0	339
ENST00000302850	INSR	Coding	Click Me	1	-0.364	143	-20.13	1	0	0	0	429
ENST00000368457	PYGO2	Coding	Click Me	1	-0.419	146	-22.78	1	0	0	0	1762
ENST00000329858	LPAR5	Coding	Click Me	1	-0.301	157	-17.44	1	0	0	0	1295
ENST00000268485	MARVELD3	Coding	Click Me	2	-0.679	333	-36.68	2	0	0	0	1662
ENST00000359440	TMC3	Coding	Click Me	1	-0.304	147	-22.7	1	0	0	0	1202
ENST00000248444	VIL1	Coding	Click Me	2	-0.684	312	-50.85	2	0	0	0	3959
ENST00000323848	SRRM1	Coding	Click Me	1	-0.309	144	-21.48	1	0	0	0	995
ENST00000641898	OR51A4	Coding	Click Me	1	-0.302	156	-25.95	1	0	0	0	3328
ENST00000382410	DEFB125	Coding	Click Me	1	-0.404	159	-16	1	0	0	0	238
ENST00000289371	EIF5B	Coding	Click Me	1	-0.397	149	-19.52	1	0	0	0	1912
ENST00000227348	CRTAM	Coding	Click Me	1	-0.332	156	-23.02	1	0	0	0	1240
ENST00000326505	B3GNT5	Coding	Click Me	1	-0.311	149	-14.75	1	0	0	0	2456
ENST00000344222	ZNF550	Coding	Click Me	1	-0.34	149	-18.78	1	0	0	0	2466
ENST00000359193	HIST1H2AG	Coding	Click Me	1	-0.373	147	-16.13	1	0	0	0	2355
ENST00000609480	ATP6V1FNB	Coding	Click Me	1	-0.374	157	-17.58	1	0	0	0	3269
ENST00000619754	CYP4A22	Coding	Click Me	1	-0.334	171	-28.17	1	0	0	0	1245
ENST00000401053	ZNF135	Coding	Click Me	1	-0.326	152	-20.94	1	0	0	0	1294
ENST00000334344	ARID2	Coding	Click Me	1	-0.395	158	-17.74	1	0	0	0	2962
ENST00000355537	ZNF536	Coding	Click Me	1	-0.33	153	-27.53	1	0	0	0	895
ENST00000379095	NGRN	Coding	Click Me	1	-0.359	166	-25.01	1	0	0	0	1679
ENST00000396365	LILRA6	Coding	Click Me	1	-0.322	143	-20.91	1	0	0	0	404
ENST00000524913	ZC2HC1C	Coding	Click Me	1	-0.323	172	-22.13	1	0	0	0	2423
ENST00000397829	TCP10	Coding	Click Me	1	-0.403	147	-21.08	1	0	0	0	992
ENST00000332303	NSMCE3	Coding	Click Me	1	-0.346	145	-19.12	1	0	0	0	642
ENST00000308268	PSMA8	Coding	Click Me	1	-0.312	167	-17.72	1	0	0	0	944
ENST00000368009	NIT1	Coding	Click Me	1	-0.334	161	-21.53	1	0	0	0	302
ENST00000312838	RNF166	Coding	Click Me	1	-0.356	160	-18.42	1	0	0	0	1073
ENST00000369462	BRCC3	Coding	Click Me	1	-0.351	170	-26.5	1	0	0	0	5347
ENST00000269209	GAREM1	Coding	Click Me	1	-0.306	161	-17.19	1	0	0	0	371
ENST00000083182	APPBP2	Coding	Click Me	1	-0.39	158	-15.64	1	0	0	0	4434
ENST00000360428	DSC3	Coding	Click Me	1	-0.366	140	-23.96	1	0	0	0	4818
ENST00000308987	CKS1B	Coding	Click Me	1	-0.365	140	-23.71	1	0	0	0	2358
ENST00000377669	KLF12	Coding	Click Me	1	-0.382	162	-17.34	1	0	0	0	9478
ENST00000641320	OR5AS1	Coding	Click Me	1	-0.329	154	-22.95	1	0	0	0	6798
ENST00000477853	EMC1	Coding	Click Me	1	-0.333	152	-22.27	1	0	0	0	7286
ENST00000252660	MAS1	Coding	Click Me	1	-0.313	143	-18.59	1	0	0	0	143
ENST00000646673	SAMHD1	Coding	Click Me	1	-0.352	161	-20.87	1	0	0	0	3159
ENST00000358075	MAGT1	Coding	Click Me	1	-0.411	157	-19.2	1	0	0	0	3534
ENST00000304501	SOX7	Coding	Click Me	1	-0.44	149	-20.41	1	0	0	0	1970
ENST00000285311	DKK2	Coding	Click Me	1	-0.35	153	-16.17	1	0	0	0	2152
ENST00000596209	ZNF99	Coding	Click Me	1	-0.325	163	-21.61	1	0	0	0	5131
ENST00000258742	NUPL2	Coding	Click Me	1	-0.406	150	-21.18	1	0	0	0	4897
ENST00000577390	CDH8	Coding	Click Me	1	-0.32	165	-19.19	1	0	0	0	6366
ENST00000378204	EXT1	Coding	Click Me	1	-0.405	167	-23.33	1	0	0	0	5222
ENST00000194152	PCDHB4	Coding	Click Me	1	-0.394	157	-13.32	1	0	0	0	1235
ENST00000506823	GALNTL6	Coding	Click Me	1	-0.429	151	-20.04	1	0	0	0	1459
ENST00000263593	SIAE	Coding	Click Me	1	-0.306	150	-17.98	1	0	0	0	3838
ENST00000317135	LRCH2	Coding	Click Me	1	-0.456	147	-15.58	1	0	0	0	2596
ENST00000370282	TMED5	Coding	Click Me	1	-0.466	170	-20.89	1	0	0	0	4928
ENST00000380821	SNAPC3	Coding	Click Me	1	-0.337	141	-21.96	1	0	0	0	4709
ENST00000445192	PRG4	Coding	Click Me	1	-0.457	144	-19.03	1	0	0	0	784
ENST00000435235	SEPT7	Coding	Click Me	1	-0.433	167	-28.38	1	0	0	0	2826
MICT00000249041	CATG00000065905.1	Coding	Click Me	1	-0.352	151	-18.69	1	0	0	0	1000
ENST00000252996	TAF4	Coding	Click Me	1	-0.43	167	-20.98	1	0	0	0	1370
MICT00000260021	CATG00000067568.1	Coding	Click Me	1	-0.348	165	-26.69	1	0	0	0	1000
ENST00000298198	PGM2L1	Coding	Click Me	1	-0.337	166	-22.34	1	0	0	0	6336
ENST00000422689	ZNF880	Coding	Click Me	1	-0.344	171	-23.91	1	0	0	0	2137
ENST00000513237	TET2	Coding	Click Me	1	-0.316	149	-15	1	0	0	0	3297
ENST00000361833	ASTN1	Coding	Click Me	1	-0.382	154	-15.36	1	0	0	0	4484
ENST00000366832	TCP10L2	Coding	Click Me	1	-0.403	147	-21.08	1	0	0	0	992
ENST00000380345	LHFPL2	Coding	Click Me	1	-0.339	152	-20.88	1	0	0	0	3680
ENST00000393047	NKAPD1	Coding	Click Me	1	-0.372	161	-19.83	1	0	0	0	2178
ENST00000305963	MMGT1	Coding	Click Me	1	-0.333	148	-15.66	1	0	0	0	4451
ENST00000366615	COA6	Coding	Click Me	1	-0.443	178	-29.1	1	0	0	0	231
ENST00000193322	OSTM1	Coding	Click Me	1	-0.304	150	-16.43	1	0	0	0	3472
ENST00000378119	C6orf62	Coding	Click Me	1	-0.34	148	-18.03	1	0	0	0	2253
HBMT00000250461	CATG00000005832.1	Coding	Click Me	1	-0.331	155	-18.5	1	0	0	0	1000
ENST00000272224	GDF7	Coding	Click Me	1	-0.301	155	-19.91	1	0	0	0	3539
ENST00000442160	ZNF410	Coding	Click Me	1	-0.366	152	-18.95	1	0	0	0	812
ENST00000367262	RABIF	Coding	Click Me	1	-0.372	162	-20.04	1	0	0	0	4760
ENST00000613296	ALMS1	Coding	Click Me	1	-0.321	145	-18.29	1	0	0	0	307
ENST00000315330	CLEC1A	Coding	Click Me	1	-0.366	156	-22.02	1	0	0	0	1779
ENST00000366834	GPR31	Coding	Click Me	1	-0.427	142	-20.61	1	0	0	0	601
ENST00000273153	CSRNP1	Coding	Click Me	1	-0.302	160	-14.22	1	0	0	0	3213
ENST00000244020	SRSF6	Coding	Click Me	1	-0.426	165	-22.69	1	0	0	0	3177
ENST00000357006	ZBTB14	Coding	Click Me	1	-0.342	148	-19.84	1	0	0	0	4978
ENST00000244869	EREG	Coding	Click Me	1	-0.359	165	-24.16	1	0	0	0	3952
ENST00000616898	HEMGN	Coding	Click Me	1	-0.347	152	-19.48	1	0	0	0	593
ENST00000357484	ARPIN	Coding	Click Me	1	-0.315	146	-23.36	1	0	0	0	5266
ENST00000379881	SOHLH2	Coding	Click Me	1	-0.346	144	-19.97	1	0	0	0	826
ENST00000203664	OTUB2	Coding	Click Me	1	-0.347	160	-20.1	1	0	0	0	3008
ENST00000398319	CABIN1	Coding	Click Me	1	-0.448	148	-16.68	1	0	0	0	432
ENST00000305363	TMPRSS11E	Coding	Click Me	1	-0.386	144	-16.03	1	0	0	0	800
ENST00000375789	DDAH2	Coding	Click Me	1	-0.398	156	-17.33	1	0	0	0	653
ENST00000370752	INTS6L	Coding	Click Me	1	-0.344	157	-18.55	1	0	0	0	899
ENST00000388822	METTL14	Coding	Click Me	1	-0.305	157	-19	1	0	0	0	5227
ENST00000278568	PAK1	Coding	Click Me	1	-0.348	159	-20.55	1	0	0	0	1753
ENST00000617312	NR2C2	Coding	Click Me	1	-0.358	143	-19.87	1	0	0	0	6265
ENST00000339697	SERINC1	Coding	Click Me	1	-0.316	176	-20.84	1	0	0	0	8313
ENST00000537040	RHBG	Coding	Click Me	1	-0.322	148	-20.46	1	0	0	0	472
ENST00000561981	FRRS1L	Coding	Click Me	1	-0.388	149	-26.37	1	0	0	0	7175
ENST00000281031	NDUFC2	Coding	Click Me	1	-0.36	158	-18.72	1	0	0	0	1691
ENST00000304698	FAM171B	Coding	Click Me	1	-0.316	174	-22.28	1	0	0	0	3135
ENST00000556492	NAA30	Coding	Click Me	1	-0.318	141	-19.41	1	0	0	0	6401
ENST00000374692	TMEM38B	Coding	Click Me	1	-0.3	148	-17.92	1	0	0	0	2536
ENST00000458258	PTBP3	Coding	Click Me	1	-0.36	142	-26.24	1	0	0	0	6135
ENST00000244496	RRP36	Coding	Click Me	1	-0.366	160	-30.89	1	0	0	0	5117
ENST00000508632	OCIAD2	Coding	Click Me	1	-0.435	156	-16	1	0	0	0	4825
ENST00000518529	SFTA3	Coding	Click Me	1	-0.375	142	-27.35	1	0	0	0	570
ENST00000310128	KCNE3	Coding	Click Me	1	-0.311	145	-18.5	1	0	0	0	2411
ENST00000427401	ZNF737	Coding	Click Me	1	-0.371	155	-15.12	1	0	0	0	6600
ENST00000304527	SH3D19	Coding	Click Me	1	-0.33	148	-21.77	1	0	0	0	1810
ENST00000597116	AC091948.1	Coding	Click Me	1	-0.423	165	-17.79	1	0	0	0	50
ENST00000263849	ZC2HC1A	Coding	Click Me	1	-0.382	161	-18.69	1	0	0	0	2272
ENST00000641983	MAPK10	Coding	Click Me	1	-0.3	148	-18.42	1	0	0	0	4750
uc001wlf.3	DHRS4L2	Coding	Click Me	1	-0.342	167	-21.53	1	0	0	0	1832
ENST00000287878	PRKAG2	Coding	Click Me	1	-0.316	154	-19.41	1	0	0	0	1090
ENST00000639725	RPS10-NUDT3	Coding	Click Me	1	-0.315	160	-20.5	1	0	0	0	3866
ENST00000531206	CDC27	Coding	Click Me	1	-0.31	161	-19.86	1	0	0	0	680
ENST00000403951	DGKB	Coding	Click Me	1	-0.357	156	-18.55	1	0	0	0	4082
ENST00000261326	MOCOS	Coding	Click Me	1	-0.447	158	-23.76	1	0	0	0	3472
ENST00000322203	RPL10A	Coding	Click Me	1	-0.382	161	-23.34	1	0	0	0	1927
ENST00000219837	KNOP1	Coding	Click Me	1	-0.345	158	-19.7	1	0	0	0	4976
ENST00000424859	LHFPL3	Coding	Click Me	1	-0.366	157	-18.81	1	0	0	0	1017
ENST00000305513	SMYD4	Coding	Click Me	1	-0.314	142	-18.18	1	0	0	0	1801
ENST00000392062	RHBDD1	Coding	Click Me	1	-0.308	154	-19.22	1	0	0	0	3679
MICT00000258363	CATG00000063513.1	Coding	Click Me	1	-0.37	156	-19.72	1	0	0	0	1000
ENST00000286657	ADAMTS3	Coding	Click Me	1	-0.306	153	-16.77	1	0	0	0	2167
ENST00000355801	COMMD6	Coding	Click Me	1	-0.422	153	-17.78	1	0	0	0	153
ENST00000340465	GFRAL	Coding	Click Me	1	-0.389	148	-23.18	1	0	0	0	640
ENST00000361085	ZNF37A	Coding	Click Me	1	-0.366	162	-17.01	1	0	0	0	6707
ENST00000366621	KCNK1	Coding	Click Me	1	-0.36	146	-16.1	1	0	0	0	5132
ENST00000247452	MAGEC2	Coding	Click Me	1	-0.337	149	-20.41	1	0	0	0	524
ENST00000360900	MTHFSD	Coding	Click Me	1	-0.333	152	-17.82	1	0	0	0	1835
FTMT21200002522	CATG00000060036.1	Coding	Click Me	1	-0.309	166	-30.95	1	0	0	0	1000
ENST00000372040	GBGT1	Coding	Click Me	1	-0.3	162	-24.29	1	0	0	0	640
ENST00000531967	ECHDC1	Coding	Click Me	1	-0.335	141	-24.69	1	0	0	0	1157
MICT00000344922	CATG00000102601.1	Coding	Click Me	1	-0.307	161	-22.77	1	0	0	0	1000
ENST00000381923	TMEM52B	Coding	Click Me	1	-0.371	154	-28.26	1	0	0	0	1645
ENST00000222511	GTPBP10	Coding	Click Me	1	-0.44	158	-14.96	1	0	0	0	6301
ENST00000283426	PLEKHG4B	Coding	Click Me	1	-0.409	161	-15.21	1	0	0	0	7649
ENST00000331923	PAXBP1	Coding	Click Me	1	-0.307	148	-15.21	1	0	0	0	1128
ENST00000335393	FAM129C	Coding	Click Me	1	-0.311	151	-26.34	1	0	0	0	276
ENST00000382376	DEFB132	Coding	Click Me	1	-0.306	158	-15.62	1	0	0	0	1790
ENST00000266659	GLIPR1	Coding	Click Me	1	-0.334	167	-24.54	1	0	0	0	4875
ENST00000456793	OST4	Coding	Click Me	1	-0.309	165	-22.92	1	0	0	0	467
ENST00000379510	CNKSR2	Coding	Click Me	1	-0.34	141	-21.25	1	0	0	0	2174
ENST00000254878	RIDA	Coding	Click Me	1	-0.369	141	-16.94	1	0	0	0	503
ENST00000316403	CLU	Coding	Click Me	1	-0.36	162	-21.28	1	0	0	0	2681
ENST00000342308	TMEM230	Coding	Click Me	1	-0.311	144	-16.02	1	0	0	0	951
ENST00000394689	BRD7	Coding	Click Me	1	-0.382	146	-20.34	1	0	0	0	181
ENST00000367462	BRINP3	Coding	Click Me	1	-0.373	146	-20.51	1	0	0	0	356
ENST00000305454	VXN	Coding	Click Me	1	-0.4	155	-18.12	1	0	0	0	2448
ENST00000324593	ZNF410	Coding	Click Me	1	-0.371	152	-18.95	1	0	0	0	737
ENST00000400256	COLEC12	Coding	Click Me	1	-0.324	166	-17.92	1	0	0	0	690
ENST00000289448	HMHB1	Coding	Click Me	1	-0.314	144	-17.37	1	0	0	0	151
ENST00000361017	CTRB1	Coding	Click Me	1	-0.339	154	-18.62	1	0	0	0	58
ENST00000622768	GRIA3	Coding	Click Me	1	-0.319	162	-19.51	1	0	0	0	2195
ENST00000509176	CCSER1	Coding	Click Me	1	-0.357	140	-14.75	1	0	0	0	3162
ENST00000314471	SAMD4B	Coding	Click Me	1	-0.306	152	-24.61	1	0	0	0	1399
ENST00000396444	USP8	Coding	Click Me	1	-0.372	151	-21.59	1	0	0	0	2007
ENST00000453304	UNC5C	Coding	Click Me	1	-0.304	163	-21.44	1	0	0	0	6730
ENST00000261296	TGDS	Coding	Click Me	1	-0.382	167	-26.16	1	0	0	0	728
ENST00000302418	KIF5B	Coding	Click Me	1	-0.308	142	-15.94	1	0	0	0	3198
ENST00000340578	RANBP3	Coding	Click Me	1	-0.404	154	-24.34	1	0	0	0	1471
ENST00000409774	GPATCH11	Coding	Click Me	1	-0.338	142	-19.83	1	0	0	0	2981
ENST00000222139	EPOR	Coding	Click Me	1	-0.317	162	-24.61	1	0	0	0	779
ENST00000303903	SYCE1	Coding	Click Me	1	-0.366	157	-24.8	1	0	0	0	50
ENST00000296280	MASP1	Coding	Click Me	1	-0.345	158	-19.43	1	0	0	0	1602
ENST00000589717	ZNF253	Coding	Click Me	1	-0.415	151	-15.42	1	0	0	0	1927
ENST00000430805	RCBTB2	Coding	Click Me	1	-0.395	149	-15.38	1	0	0	0	1141
ENST00000301190	ANKRD33	Coding	Click Me	1	-0.39	155	-15.73	1	0	0	0	416
HBMT00000237985	CATG00000004565.1	Coding	Click Me	1	-0.332	159	-25.02	1	0	0	0	1000
ENST00000366592	GPR137B	Coding	Click Me	1	-0.35	150	-18.94	1	0	0	0	2895
ENST00000474524	MED12L	Coding	Click Me	1	-0.348	140	-27.26	1	0	0	0	4268
ENST00000320394	IQCK	Coding	Click Me	1	-0.338	153	-23.94	1	0	0	0	1043
ENST00000388887	STAB2	Coding	Click Me	1	-0.412	157	-22.77	1	0	0	0	391
ENST00000182527	TRAM2	Coding	Click Me	1	-0.464	148	-19.52	1	0	0	0	5795
ENST00000310803	RASGRP1	Coding	Click Me	1	-0.302	149	-16.45	1	0	0	0	2453
ENST00000641470	OR6F1	Coding	Click Me	1	-0.386	156	-22.36	1	0	0	0	393
ENST00000393262	BBS10	Coding	Click Me	1	-0.4	172	-26.23	1	0	0	0	1339
ENST00000397126	ZNF208	Coding	Click Me	1	-0.358	164	-22.68	1	0	0	0	5096
ENST00000444614	CCDC122	Coding	Click Me	1	-0.306	145	-21.89	1	0	0	0	1069
ENST00000533632	TRAPPC4	Coding	Click Me	1	-0.331	169	-21.18	1	0	0	0	735
ENST00000342310	LMX1A	Coding	Click Me	1	-0.334	166	-22.09	1	0	0	0	2013
ENST00000418532	SLAIN1	Coding	Click Me	1	-0.339	165	-26.22	1	0	0	0	1022
ENST00000334567	TMEM212	Coding	Click Me	1	-0.338	154	-19.49	1	0	0	0	1261
ENST00000360310	BAZ1A	Coding	Click Me	1	-0.429	146	-16.33	1	0	0	0	771
ENST00000296533	NPY1R	Coding	Click Me	1	-0.377	144	-23.72	1	0	0	0	1342
ENST00000555044	ZNF410	Coding	Click Me	1	-0.31	152	-18.95	1	0	0	0	978
ENST00000534624	HSPA8	Coding	Click Me	1	-0.395	170	-19.78	1	0	0	0	245
ENST00000254624	EFR3A	Coding	Click Me	1	-0.398	158	-14.15	1	0	0	0	2747
ENST00000528443	TOR1AIP1	Coding	Click Me	1	-0.402	165	-18.45	1	0	0	0	1469
ENST00000240055	NFYB	Coding	Click Me	1	-0.331	148	-19.51	1	0	0	0	2660
ENST00000373452	ZBTB34	Coding	Click Me	1	-0.329	152	-18.44	1	0	0	0	4961
ENST00000641801	SCYGR4	Coding	Click Me	1	-0.301	145	-20.85	1	0	0	0	840
ENST00000424830	PUDP	Coding	Click Me	1	-0.374	158	-19.35	1	0	0	0	533
ENST00000455566	PPP2R2D	Coding	Click Me	1	-0.324	146	-16.04	1	0	0	0	3864
ENST00000324447	SAGE1	Coding	Click Me	1	-0.336	159	-19.02	1	0	0	0	163
ENST00000641644	OR2T6	Coding	Click Me	1	-0.335	143	-24.68	1	0	0	0	3276
ENST00000611712	LIG4	Coding	Click Me	1	-0.327	142	-17.19	1	0	0	0	1094
ENST00000483063	POLE4	Coding	Click Me	1	-0.322	169	-27.39	1	0	0	0	706
ENST00000298317	RPUSD4	Coding	Click Me	1	-0.333	144	-26.6	1	0	0	0	1324
ENST00000509479	MAML3	Coding	Click Me	1	-0.351	162	-20.8	1	0	0	0	2931
ENST00000520429	CCNC	Coding	Click Me	1	-0.35	154	-19.33	1	0	0	0	1190
ENST00000369603	SMNDC1	Coding	Click Me	1	-0.422	159	-20.23	1	0	0	0	3811
ENST00000434634	WDR73	Coding	Click Me	1	-0.332	161	-30.68	1	0	0	0	3221
ENST00000395934	ELP4	Coding	Click Me	1	-0.327	171	-18.13	1	0	0	0	2286
ENST00000413580	PHOSPHO1	Coding	Click Me	1	-0.307	152	-17.96	1	0	0	0	876
ENST00000371429	NDC1	Coding	Click Me	1	-0.487	150	-14.58	1	0	0	0	2510
ENST00000360534	DPP4	Coding	Click Me	1	-0.447	151	-15.03	1	0	0	0	1042
ENST00000310958	CCPG1	Coding	Click Me	1	-0.418	167	-21.21	1	0	0	0	4282
ENST00000396331	LILRB1	Coding	Click Me	1	-0.338	171	-22.05	1	0	0	0	1168
ENST00000360731	CLIC6	Coding	Click Me	1	-0.335	150	-17.89	0	1	0	0	1745
ENST00000359332	KLHDC1	Coding	Click Me	1	-0.343	164	-23.74	1	0	0	0	1380
ENST00000254193	SNRPA1	Coding	Click Me	1	-0.327	146	-26.46	1	0	0	0	214
ENST00000478253	ABHD6	Coding	Click Me	1	-0.398	163	-18.54	1	0	0	0	967
ENST00000361523	BECN1	Coding	Click Me	1	-0.411	158	-18.98	1	0	0	0	889
ENST00000278780	OVOL2	Coding	Click Me	1	-0.424	155	-19.45	1	0	0	0	484
ENST00000230053	B3GAT2	Coding	Click Me	1	-0.386	169	-23.14	1	0	0	0	4984
ENST00000265717	PRKAR2B	Coding	Click Me	1	-0.321	161	-16.81	1	0	0	0	2229
ENST00000373202	SGPL1	Coding	Click Me	1	-0.307	161	-21.36	1	0	0	0	3840
ENST00000397843	ARHGEF12	Coding	Click Me	1	-0.308	144	-21.77	1	0	0	0	4859
ENST00000409204	PCDH20	Coding	Click Me	1	-0.363	147	-17.31	1	0	0	0	2280
ENST00000372771	RLF	Coding	Click Me	1	-0.371	165	-20.76	1	0	0	0	474
ENST00000243706	HAUS3	Coding	Click Me	1	-0.4	144	-14.27	1	0	0	0	5163
ENST00000306121	SNX7	Coding	Click Me	1	-0.328	157	-18.59	1	0	0	0	369
ENST00000377603	POLR3F	Coding	Click Me	1	-0.36	172	-24.16	1	0	0	0	2501
ENST00000237642	STBD1	Coding	Click Me	1	-0.315	155	-27.57	1	0	0	0	1599
ENST00000298530	TMEM52B	Coding	Click Me	1	-0.371	154	-28.26	1	0	0	0	1664
ENST00000157812	PSMC4	Coding	Click Me	1	-0.382	153	-20.91	1	0	0	0	2441
ENST00000542569	SAMD8	Coding	Click Me	1	-0.314	152	-17.29	1	0	0	0	5431
ENST00000443905	ZNF506	Coding	Click Me	1	-0.421	155	-17.43	1	0	0	0	1392
ENST00000442080	GMNC	Coding	Click Me	1	-0.358	143	-17.3	1	0	0	0	3491
ENST00000354817	FAR1	Coding	Click Me	1	-0.327	146	-20.88	1	0	0	0	3572
ENST00000262570	CHCHD3	Coding	Click Me	1	-0.377	153	-18.08	1	0	0	0	775
ENST00000425175	SLC4A4	Coding	Click Me	1	-0.314	150	-22.92	1	0	0	0	4194
ENST00000392904	IGF1	Coding	Click Me	1	-0.375	159	-22.21	1	0	0	0	213
ENST00000331664	PCARE	Coding	Click Me	1	-0.33	163	-17.7	1	0	0	0	3179
uc001qxr.3	TMEM52B	Coding	Click Me	1	-0.371	154	-28.26	1	0	0	0	1664
ENST00000286031	C1orf112	Coding	Click Me	1	-0.344	156	-22.9	1	0	0	0	1093
